# Supplementary material
Source: Royal Society of Chemistry journal article supplement (doi:10.1039/d5cy01572c)
Supplement: d5cy01572c1.pdf [file d5cy01572c1.pdf]

## Supplementary information

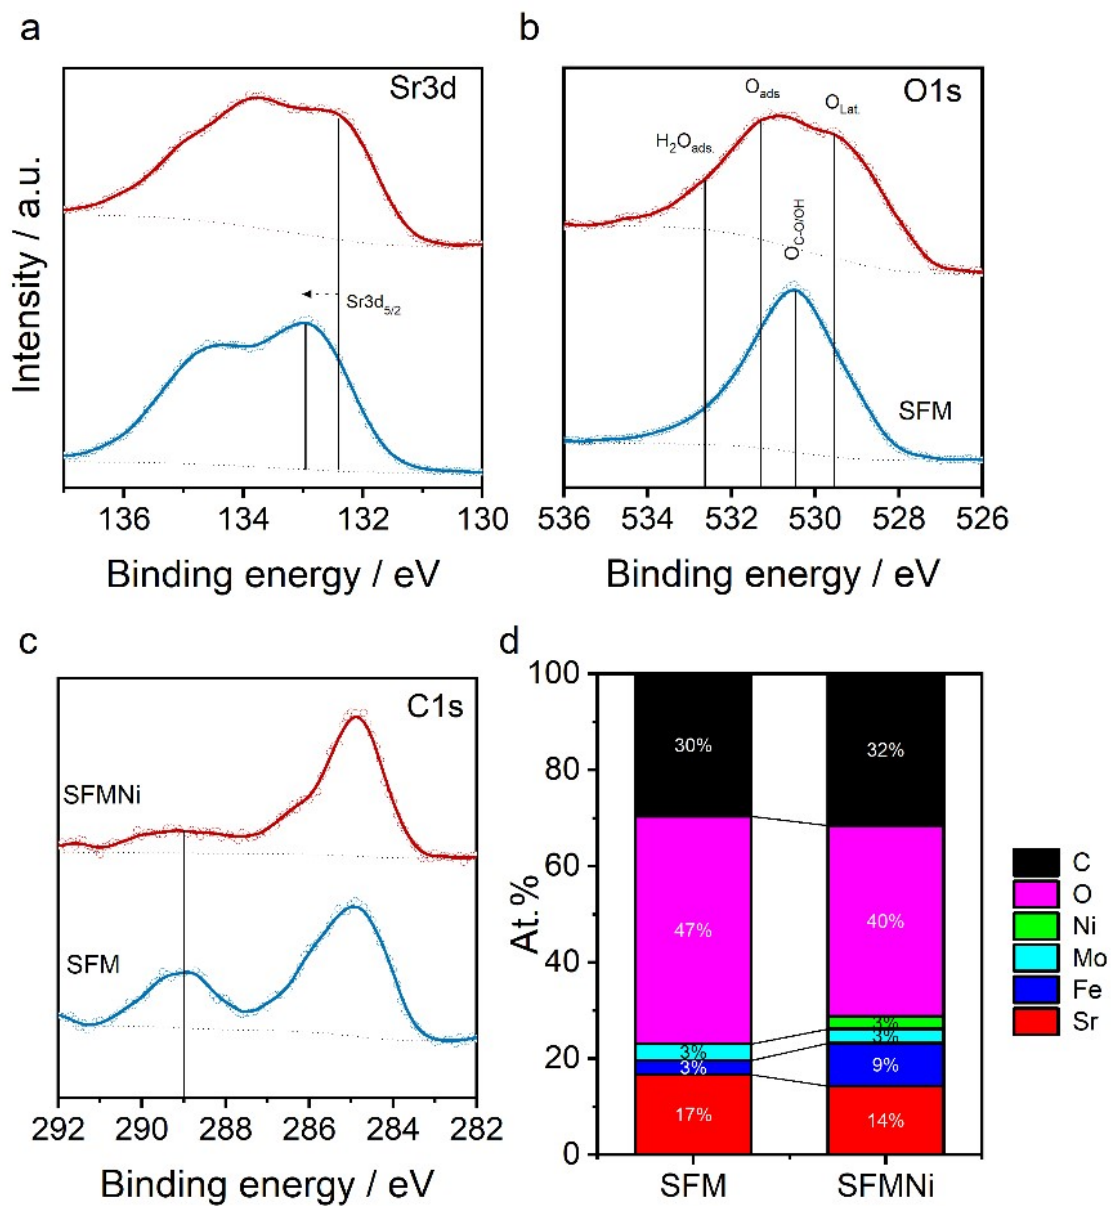

**Figure S1.** XPS analysis of as-prepared SFM and SFMNi: (a) Sr 3d, (b) O 1s, (c) C 1s spectra and (d) bar graph of atomic fractions at the surface.

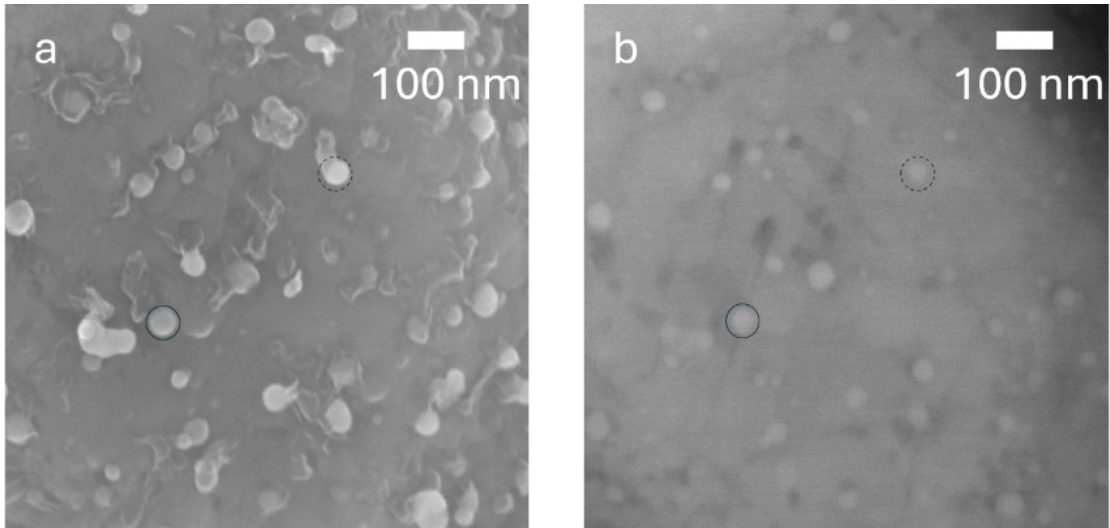

**Figure S2.** SEM micrographs of the sample showing **(a)** a secondary electron image highlighting the surface morphology and the presence of exsolved particles, and **(b)** a back-scattered electron image providing clear Z-contrast between the support, the exsolved phase, and carbonaceous species.

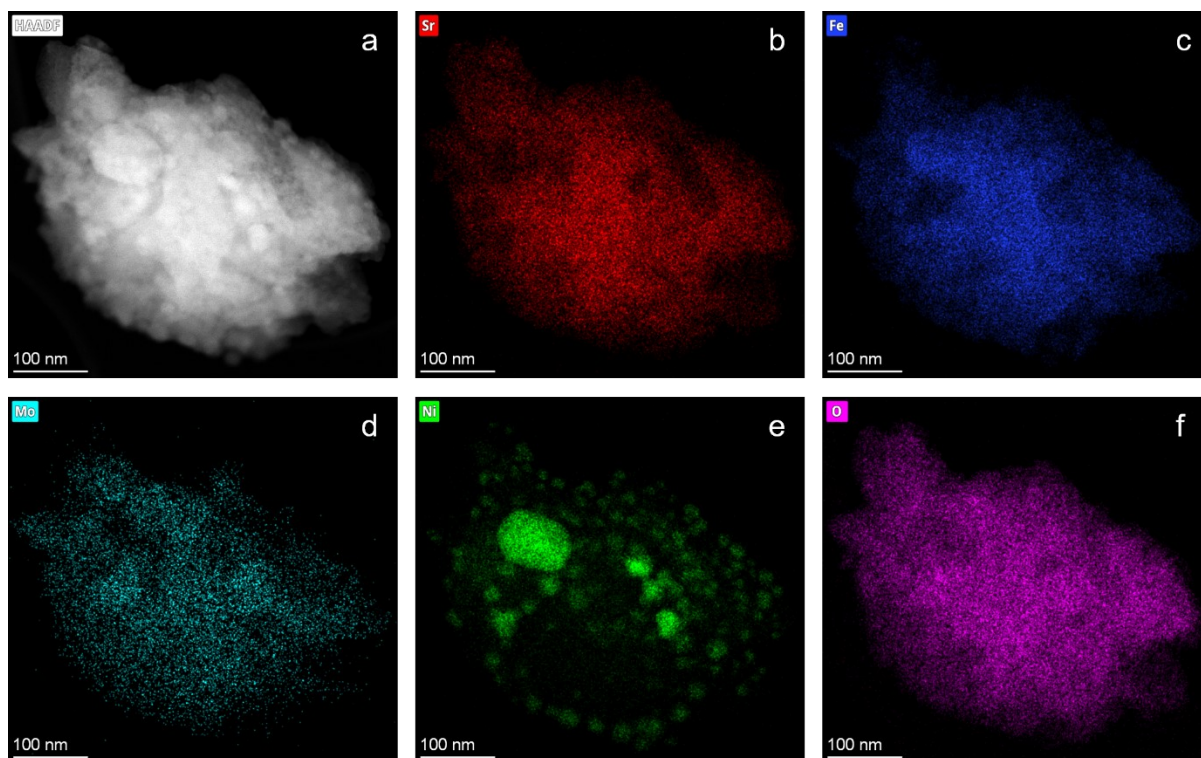

**Figure S3.** HAADF-STEM characterization of SFMNi after ethanol steam reforming (2.6% EtOH-10.4% H<sub>2</sub>O-N<sub>2</sub>) at 750 °C for 20 h. (a) HAADF-STEM image and corresponding STEM-EDX elemental maps of (b) Sr, (c) Fe, (d) Mo, (e) Ni, and (f) O.

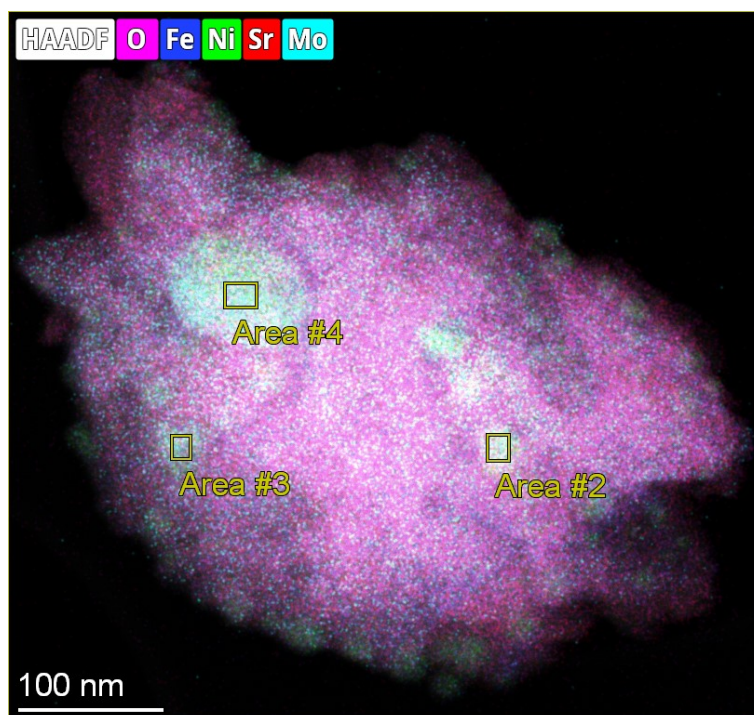

**Figure S4.** HAADF–STEM characterization of SFMNi after ethanol steam reforming (2.6% EtOH-10.4% H<sub>2</sub>O-N<sub>2</sub>) at 750 °C for 20 h. HAADF–STEM image with corresponding STEM-EDX colormix elemental map displaying the distribution of Sr, Fe, Mo, Ni, and O. These three selected areas indicate local enrichment of Ni and/or Fe.

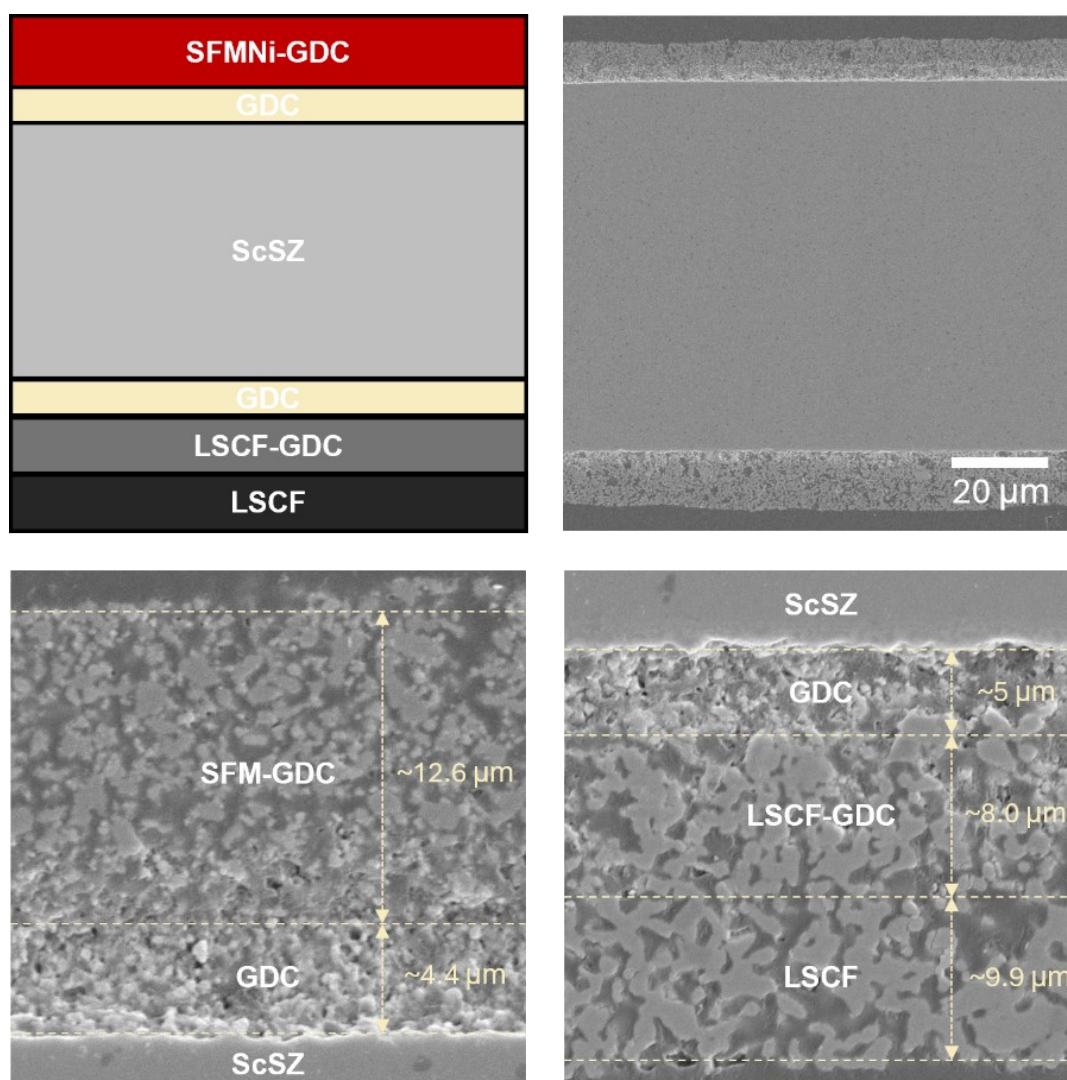

**Figure S5.** Structure and cross section of optimized cell with R-SFMNi-GDC composite fuel electrode. **(a)** schematic illustration of the complete cell architecture, **(b)** cross-sectional SEM image of a cell after calcination, demonstrating the layered configuration, **(c)** SEM images of the fuel electrode and **(d)** the air electrode, showing the layer thicknesses.

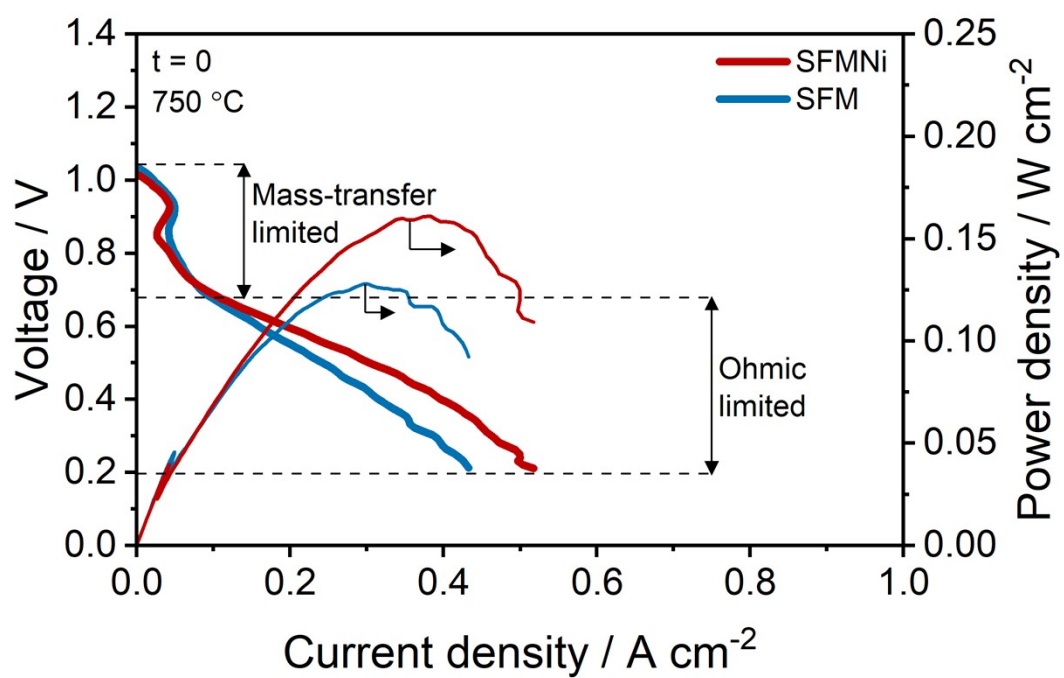

**Figure S6.** SOFC performance of SFM and SFMNi fuel electrodes in an ethanol-steam atmosphere (2.6% EtOH-10.4% H<sub>2</sub>O-N<sub>2</sub>) at 750 °C. Current-voltage and power density curves at  $t = 0$ .

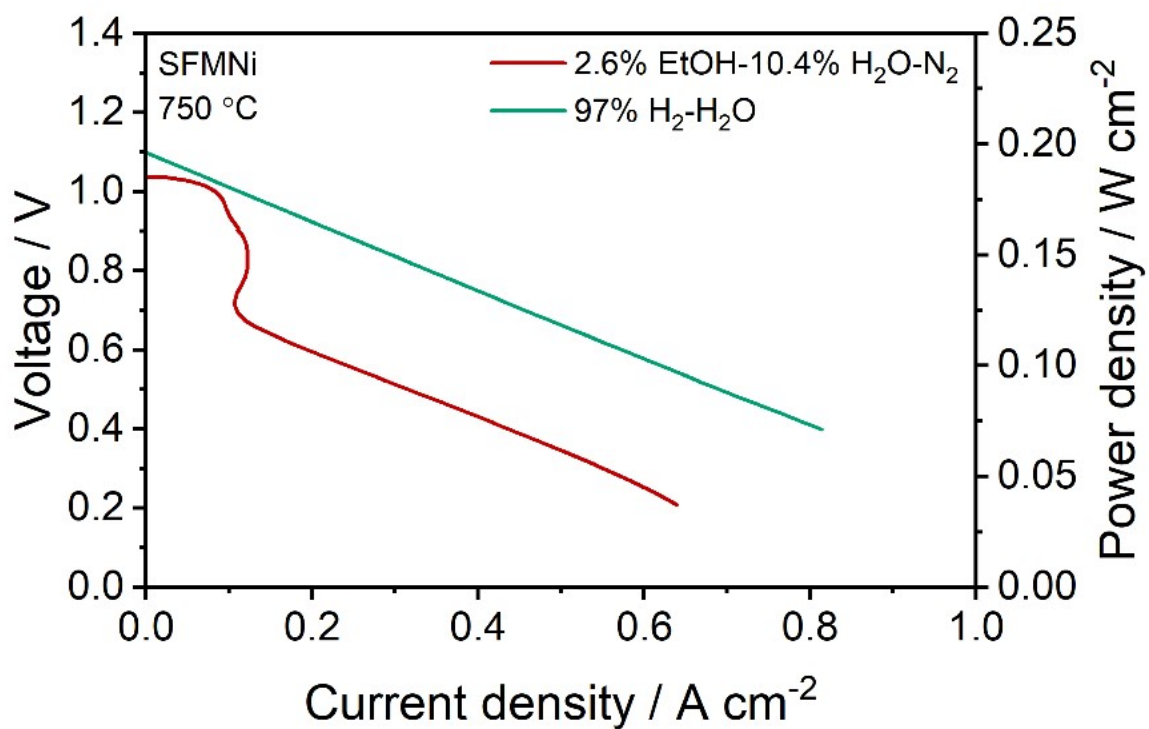

**Figure S7.** SOFC performance of SFMNi in 97% H<sub>2</sub> and in an ethanol–steam atmosphere (2.6% EtOH-10.4% H<sub>2</sub>O-N<sub>2</sub>) at 750 °C. Current-voltage curve showing the maximal electrochemical performance under abundant hydrogen and the performance under ethanol-steam, highlighting the limitation associated with limited H<sub>2</sub> availability.

**Table S1.** Atomic ratios obtained from STEM–EDX analysis of the total mapped region and the three selected areas shown in **Figure S4**. The selected areas exhibit reduced fractions of O, Sr, and Mo, accompanied by strong Ni enrichment and/or slight Fe enrichment.

|        | Sr       |       | Fe       |       | Mo       |       | Ni       |       | O        |       |
|--------|----------|-------|----------|-------|----------|-------|----------|-------|----------|-------|
|        | Fraction | Error |
|        | At.%     |       |          |       |          |       |          |       |          |       |
| Total  | 21.35    | 2.21  | 13.74    | 1.63  | 5.48     | 0.70  | 7.17     | 1.0   | 52.00    | 1.83  |
| Area 2 | 17.43    | 2.09  | 14.56    | 1.81  | 3.31     | 0.75  | 32.15    | 3.37  | 32.58    | 1.88  |
| Area 3 | 12.94    | 1.75  | 18.91    | 2.30  | 4.94     | 1.34  | 31.48    | 3.39  | 31.20    | 1.99  |
| Area 4 | 9.89     | 1.34  | 18.23    | 2.29  | 2.03     | 0.55  | 40.39    | 3.73  | 28.89    | 1.96  |

**Table S2.** Fitting parameters electrical equivalent circuit for SFM and SFMNi fuel electrodes at 750 °C, 0.6 V in 2.6% EtOH-10.4% H<sub>2</sub>O-N<sub>2</sub> as illustrated in the Nyquist plot (**Figure 4c**).

|       | R <sub>0</sub>      | R <sub>1</sub> | R <sub>2</sub> | R <sub>p</sub> |
|-------|---------------------|----------------|----------------|----------------|
|       | Ohm cm <sup>2</sup> |                |                |                |
| SFM   | 0.52                | 0.45           | 1.29           | 1.74           |
| SFMNi | 0.61                | 0.40           | 1.09           | 1.50           |

**Table S3.** Fitting parameters electrical equivalent circuit for long-term stability over 7 days of SFMNi electrode at 750 °C, 0.6 V in 2.6% EtOH-10.4% H<sub>2</sub>O-N<sub>2</sub> as illustrated in the Nyquist plot (**Figure 5b**).

|       | R <sub>0</sub>      | R <sub>1</sub> | R <sub>2</sub> | R <sub>p</sub> |
|-------|---------------------|----------------|----------------|----------------|
|       | Ohm cm <sup>2</sup> |                |                |                |
| 1 h   | 0.61                | 0.40           | 1.09           | 1.50           |
| 70 h  | 0.60                | 0.41           | 1.67           | 2.08           |
| 168 h | 0.61                | 0.39           | 1.80           | 2.29           |
